# Supplementary material for: Synergistic LaCoO3@Co3O4 bifunctional catalyst for efficient oxygen evolution and reduction: achieving low polarization
Source: Royal Society of Chemistry journal article supplement (doi:10.1039/d5ra09353h), 2026-04-22
Supplement: d5ra09353h1.pdf [file d5ra09353h1.pdf]

## Supporting Information

### **Synergistic LaCoO<sub>3</sub>@Co<sub>3</sub>O<sub>4</sub> Bifunctional Catalyst for Efficient Oxygen Evolution and Reduction: Achieving Low Polarization**

Akihito Shio<sup>a</sup>, Hayato Takada<sup>a</sup>, Yuna Fujiwara<sup>a</sup>, Taketo Imamura<sup>a</sup>, Toshiki Iwato<sup>a</sup>, Kouki Yamamoto<sup>a</sup>, Gasidit Panomsuwan<sup>b</sup>, Takahiro Ishizaki<sup>c,\*</sup>

<sup>a</sup>Materials Science and Engineering, Graduate School of Engineering and Science, Shibaura Institute of Technology, Tokyo 135-8548, Japan

<sup>b</sup>Department of Materials Engineering, Faculty of Engineering, Kasetsart University, Bangkok 10900, Thailand

<sup>c</sup>College of Engineering, Shibaura Institute of Technology, Tokyo 135-8548, Japan.

\* E-mail : [ishizaki@shibaura-it.ac.jp](mailto:ishizaki@shibaura-it.ac.jp)

#### **S1. Optimization of LCO : CO Molar Ratio**

To determine the optimal composition, we synthesized composites with different molar ratios of LCO and CO (LCO : CO = 1:1, 1:3, and 1:5) and evaluated their bifunctional activities.

## S2. Determination of ECSA and Specific Activity

The ECSA was estimated from the double-layer capacitance ( $C_{dl}$ ) determined by CV measurements at various scan rates in the non-faradaic region. A specific capacitance ( $C_s$ ) of  $0.04 \text{ mF cm}^{-2}$  was assumed for the calculation ( $\text{ECSA} = C_{dl} / C_s$ ). The specific activity was then obtained by normalizing the measured current by the ECSA.

$$\text{ECSA} = \frac{C_{dl}}{C_s}$$

$$i = C_{dl} \cdot \nu \quad (\nu: \text{scan rate [mV/s]})$$

$$i = \frac{(j_{\text{cathode@}0.25\text{V}} - j_{\text{anode@}0.25\text{V}})}{2}$$

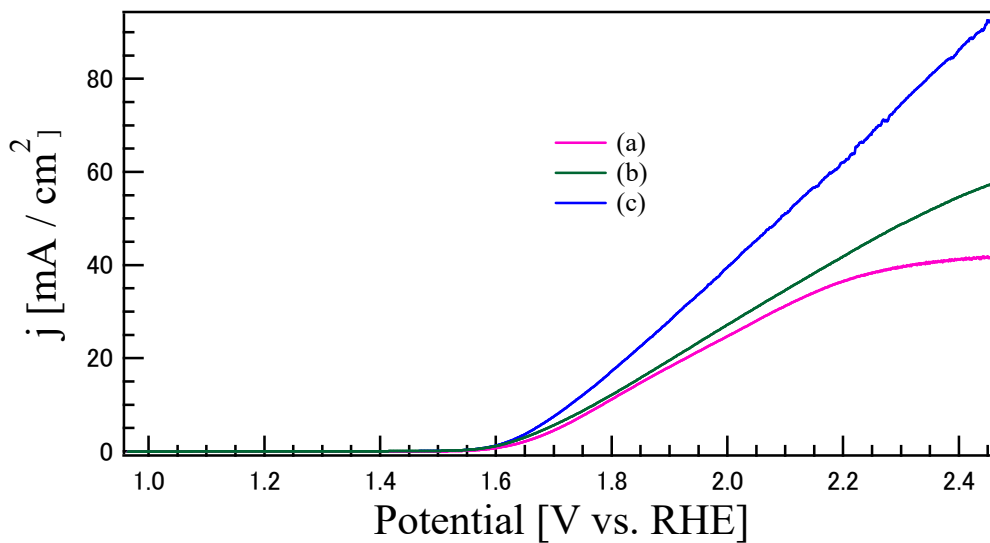

**Fig. S1.** LSV results (in 0.1M KOH aqueous solution) investigating the OER catalytic properties of the catalysts synthesized by the coprecipitation method: (a) LCO\_CO\_1, (b) LCO\_CO\_5, (c) LCO\_CO composite. (LCO\_CO\_1 : La : Co = 1 : 1 (molar ratio), LCO\_CO\_5 : La : Co = 1 : 5 (molar ratio), LCO\_CO : La : Co = 1 : 3 (molar ratio)).

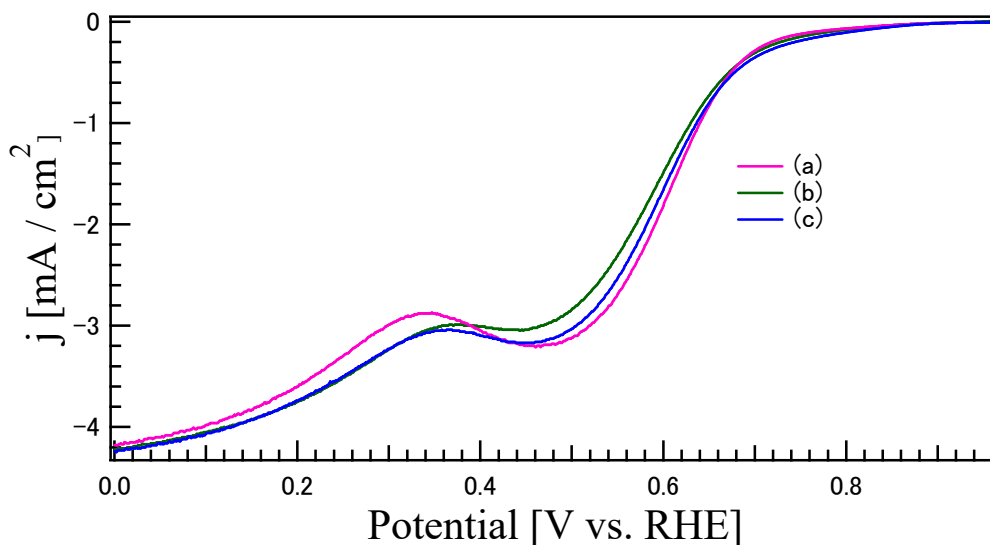

**Fig. S2.** LSV curves (in 0.1M KOH aqueous solution) for the oxygen reduction reaction (ORR) of the catalysts synthesized by the coprecipitation method: (a) LCO\_CO\_1, (b) LCO\_CO\_5, (c) LCO\_CO composite. (LCO\_CO\_1 : La : Co = 1 : 1 (molar ratio), LCO\_CO\_5 : La : Co = 1 : 5 (molar ratio), LCO\_CO : La : Co = 1 : 3 (molar ratio)).

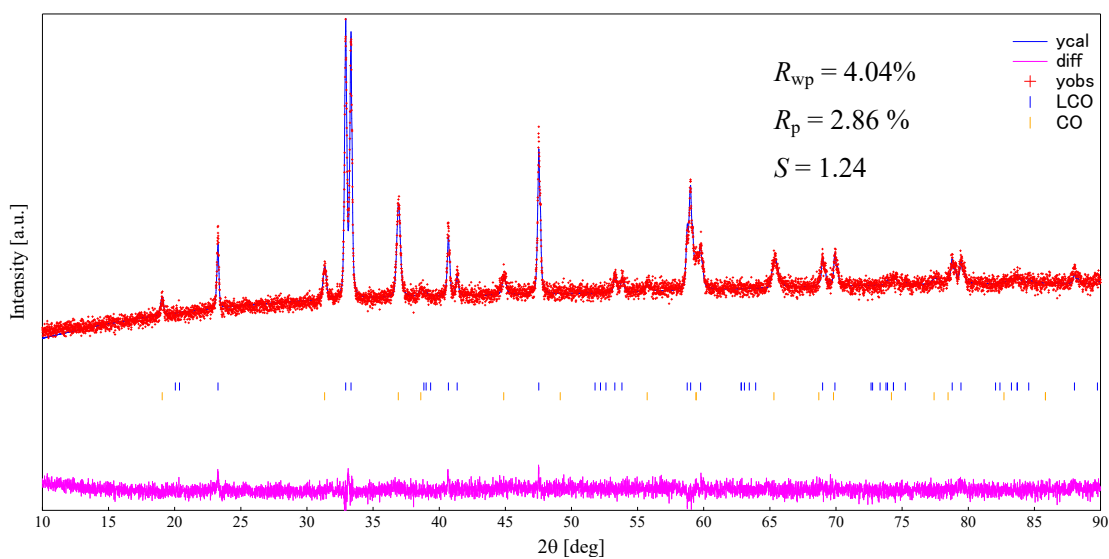

**Fig. S3.** Rietveld refinement patterns of the LCO\_CO composite. The observed intensity is represented by red crosses ( $y_{\text{obs}}$ ), the calculated pattern by a blue line ( $y_{\text{cal}}$ ), and the difference between them by a magenta line (diff) at the bottom. The vertical tick marks indicate the Bragg reflection positions for  $\text{LaCoO}_3$  (blue, upper) and  $\text{Co}_3\text{O}_4$  (orange, lower). The refinement was performed using the WPPF method, yielding reliable fitting parameters:  $R_{\text{wp}} = 4.04\%$ ,  $R_{\text{p}} = 2.86\%$ , and  $S = 1.24$ .

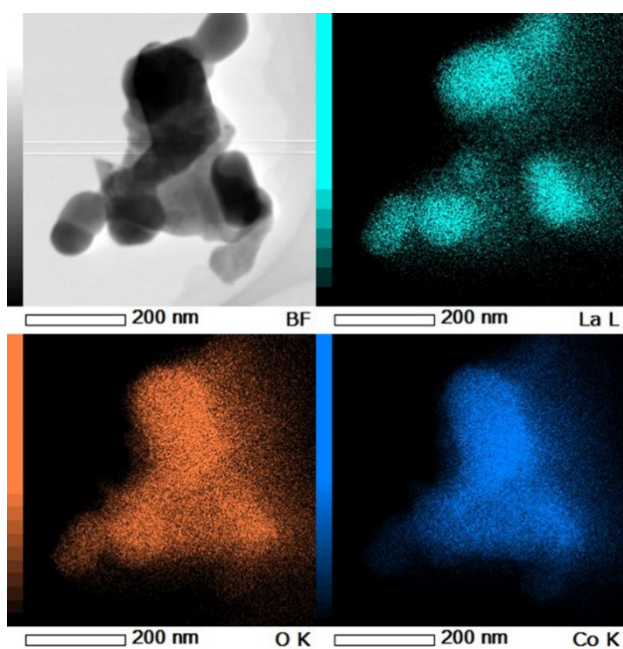

**Fig. S4.** (a) STEM-BF image and (b-d) corresponding EDS elemental mapping images (La, O, and Co) of the LCO\_CO composite. The scale bars represent 200 nm.

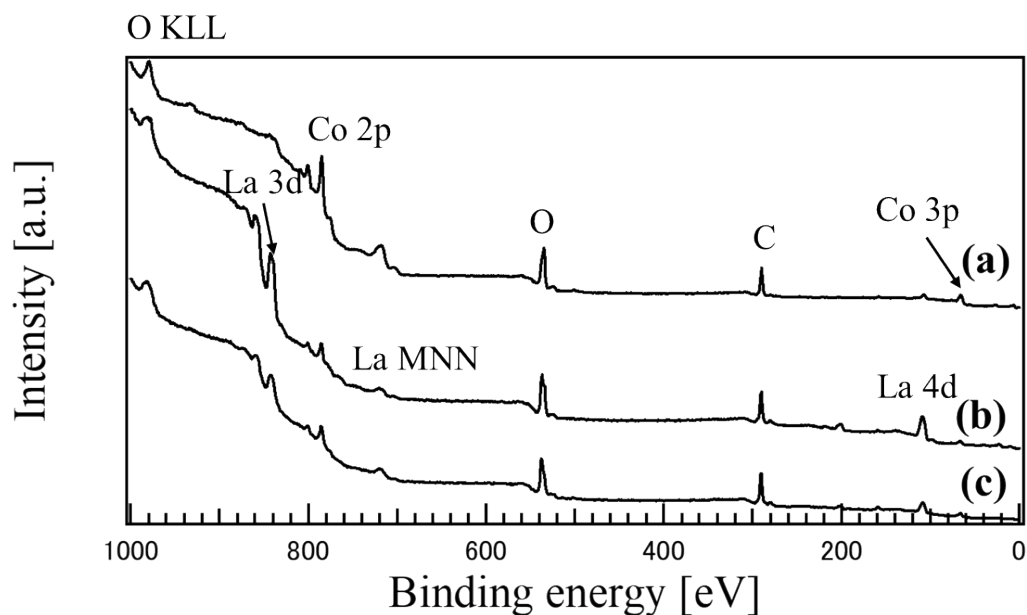

**Fig. S5.** XPS survey spectra of (a) CO, (b) LCO, and (c) LCO\_CO composite, showing the characteristic peaks of La, Co, O, and C.

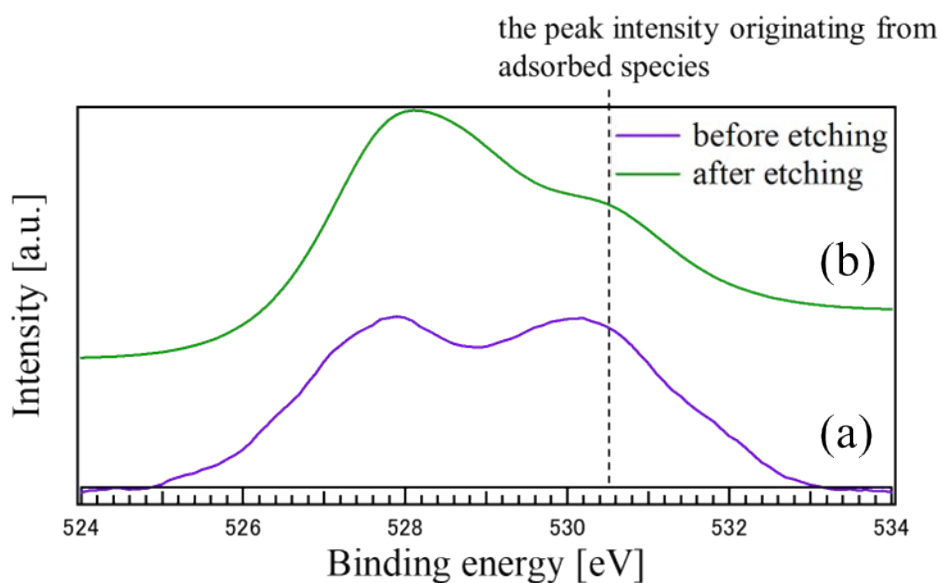

**Fig. S6.** XPS O 1s spectra of the LCO\_CO composite (a) before and (b) after Ar-ion sputtering for 5 seconds. The persistence of the peak at  $\sim 531.3$  eV after the removal of surface contaminants confirms its assignment to lattice oxygen vacancies ( $O_{\text{vac}}$ ) rather than purely adsorbed species.

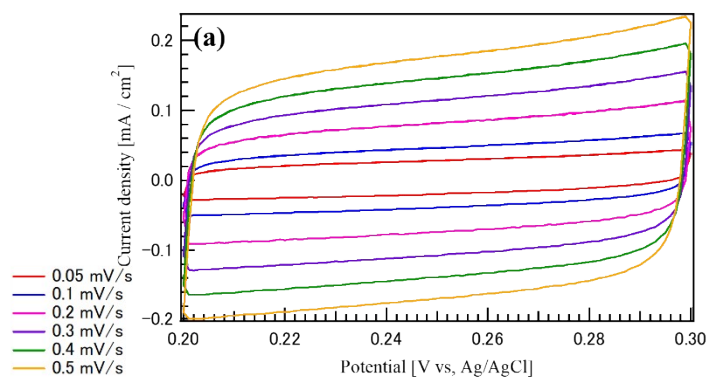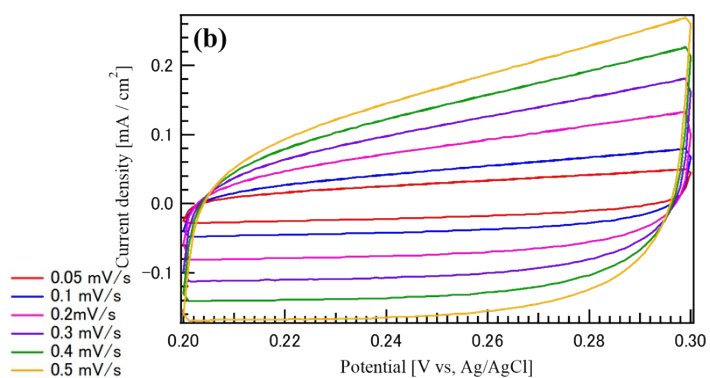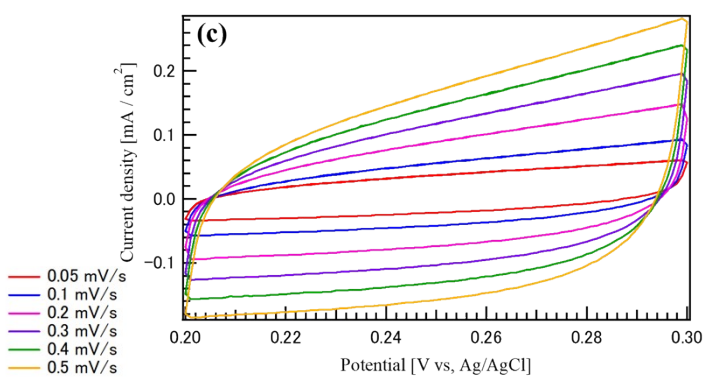

**Fig.S7.** CV curves (in 1 M KOH) of the catalysts synthesized by the coprecipitation method: (a) CO, (b) LCO, and (c) LCO\_CO.

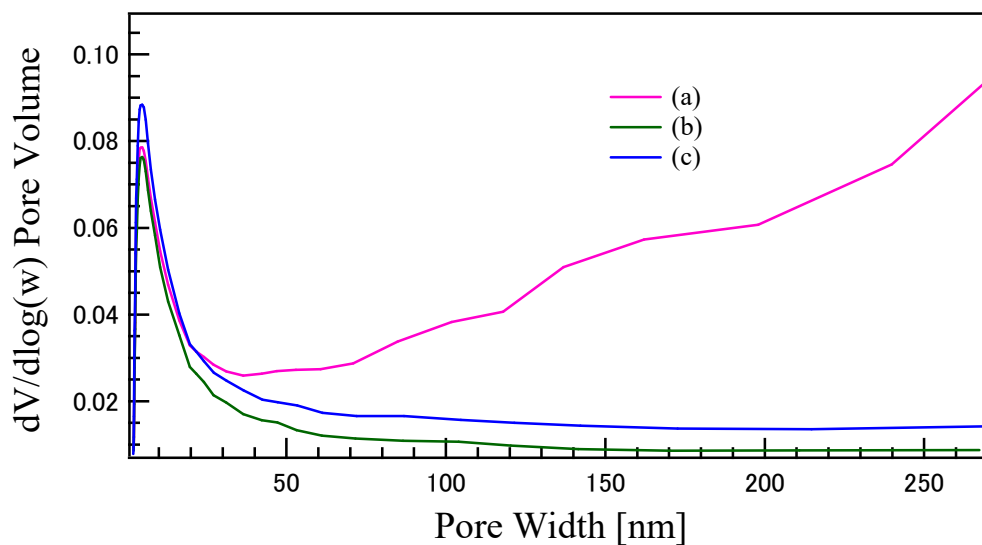

**Fig. S8.** Pore size distribution (PSD) curves of (a) CO, (b) LCO, and (c) LCO\_CO composite calculated from the N<sub>2</sub> adsorption isotherms using the BJH method.

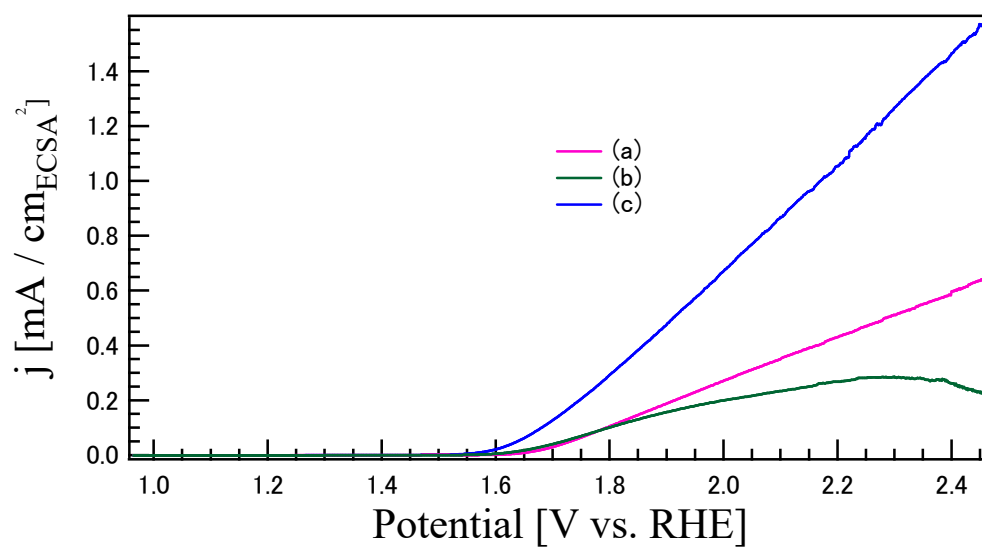

**Fig. S9.** Current density normalized by ECSA of LSV curves (in 0.1M KOH aqueous solution) for the oxygen evolution reaction (OER) of the catalysts synthesized by the coprecipitation method: (a) CO, (b) LCO, and (c) LCO\_CO composite.

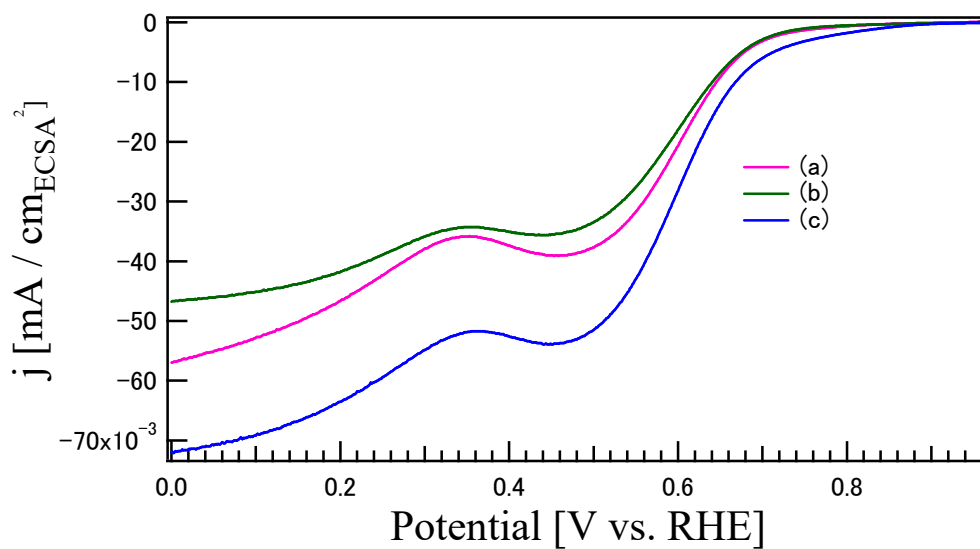

**Fig. S10.** Current density normalized by ECSA of LSV curves (in 0.1M KOH aqueous solution) for the oxygen reduction reaction (ORR) of the catalysts synthesized by the coprecipitation method: (a) CO, (b) LCO, and (c) LCO\_CO composite.

**Table S1.** Comparison of ORR and OER catalytic activity parameters for LCO\_CO composites synthesized with different LCO : CO molar ratios.

| Sample       | Half-wave potential ( $E_{1/2}$ ) [V] | Potentials at 10 mA/cm <sup>2</sup> [V] | $\Delta E$ [V] |
|--------------|---------------------------------------|-----------------------------------------|----------------|
| (a) LCO_CO_1 | 0.585                                 | 1.785                                   | 1.2            |
| (b) LCO_CO_5 | 0.561                                 | 1.770                                   | 1.21           |
| (c) LCO_CO   | 0.587                                 | 1.729                                   | 1.14           |

**Table S2.** Quantitative phase analysis of the LCO\_CO composite determined by Rietveld refinement (WPPF).

| Sample | LCO [wt.%] | CO [wt.%] |
|--------|------------|-----------|
| LCO_CO | 67.3       | 32.7      |

**Table S3.** Elemental compositions (at.%) of CO, LCO, and LCO\_CO composite catalysts determined by energy-dispersive X-ray spectroscopy (EDS).

| Sample | Co [at.%] | O [at.%] | La [at.%] |
|--------|-----------|----------|-----------|
| CO     | 31.0      | 69.0     | -         |
| LCO    | 15.1      | 68.57    | 16.3      |
| LCO_CO | 25.0      | 70.3     | 4.8       |

**Table S4.** Double-layer capacitance ( $C_{dl}$ ) values of CO, LCO, and LCO\_CO composite catalysts derived from cyclic voltammetry measurements at various scan rates.

|               | (a) CO | (b) LCO | (c) LCO_CO |
|---------------|--------|---------|------------|
| $C_{dl}$ (mF) | 0.3312 | 0.3076  | 0.2964     |

**Table S5.** Comparison of bifunctional catalytic activities (ORR and OER) of the LCO\_CO composite with recently reported catalysts.

| Catalyst                                       | Electrolyte        | $E_{1/2}$<br>(V) | $\eta_{10}$<br>(V) | $\Delta E$<br>(V) | Year | Ref.      |
|------------------------------------------------|--------------------|------------------|--------------------|-------------------|------|-----------|
| LCO_CO                                         | 0.1 M KOH          | 0.587            | 1.729              | 1.14              | 2026 | This work |
| La(5B <sub>0.2</sub> )O <sub>3</sub>           | 1 M KOH            | 0.723            | 1.681              | 0.96              | 2025 | 1         |
| LSCO                                           | 0.1 M /<br>1 M KOH | 0.85             | 1.69               | 0.96              | 2025 | 2         |
| LSF0.95/C                                      | 0.1 M KOH          | 0.66             | 1.70               | 1.04              | 2021 | 3         |
| CoFe <sub>2</sub> O <sub>4</sub> /NCNTs        | 0.1 M KOH          | 0.80             | 1.65               | 0.85              | 2019 | 4         |
| (FeCrCuNiMn) <sub>3</sub> O <sub>4</sub> /3D-G | 1 M KOH            | 0.837            | 1.589              | 0.75              | 2025 | 5         |

References:

- 1 G. Fu, R. Hou, L. Sun, S. Liu, H. Sun, Z. Shao and W. Jung, Rational regulation of high-entropy perovskite oxides through hole doping for efficient oxygen electrocatalysis, *ACS Appl. Mater. Interfaces*, 2025, **17**(5), 7860–7869. DOI: 10.1021/acscami.4c20338.
- 2 Y. Ali, S. Dwivedi, M. S. Alivand, A. Sanjid, A. Tanksale and P. Chakraborty Banerjee, Highly stable and porous triple perovskite oxide as a bifunctional electrocatalyst for rechargeable Zn-air batteries, *Chem. Eng. J.*, 2025, **516**, 163928. DOI: 10.1016/j.cej.2025.163928.
- 3 L. Luo, Z. Liu and Z. Wang, (La<sub>0.65</sub>Sr<sub>0.3</sub>)<sub>0.95</sub>FeO<sub>3- $\delta$</sub>  perovskite with high oxygen vacancy as efficient bifunctional electrocatalysts for Zn–air batteries, *RSC Adv.*, 2021, **11**(62), 38977–38981. DOI: 10.1039/D1RA07920D.
- 4 X.-T. Wang, T. Ouyang, L. Wang, J.-H. Zhong, T. Ma and Z.-Q. Liu, Surface-interface engineering of hierarchical CoFe<sub>2</sub>O<sub>4</sub>/Ni-Fe layered double hydroxide nanowires for efficient oxygen evolution, *Angew. Chem., Int. Ed.*, 2019, **58**(38), 13291–13296. DOI: 10.1002/anie.201905448.
- 5 W. Li, Y. Wang, X. Sun, Y. Liang, J. Wang, L. Zhang and H. Zhang, High-entropy spinel oxides with oxygen-rich vacancies improve the catalytic performance for low-temperature flexible zinc-air batteries, *ACS Sustainable Chem. Eng.*, 2025, **13**(39), 16459–16473. DOI: 10.1021/acssuschemeng.5c05910.
